# Supplementary material
Source: PubMed Central journal article supplement (PMC8906815)
Supplement: mmc2.pdf [file mmc2.pdf]

# THE LANCET

## Public Health

### Supplementary appendix 2

This appendix formed part of the original submission and has been peer reviewed. We post it as supplied by the authors.

Supplement to: Shariff SZ, Richard L, Hwang SW, et al. COVID-19 vaccine coverage and factors associated with vaccine uptake among 23 247 adults with a recent history of homelessness in Ontario, Canada: a population-based cohort study. *Lancet Public Health* 2022; published online March 9. [https://doi.org/10.1016/S2468-2667\(22\)00037-8](https://doi.org/10.1016/S2468-2667(22)00037-8).

## Appendix 1: Study flowchart

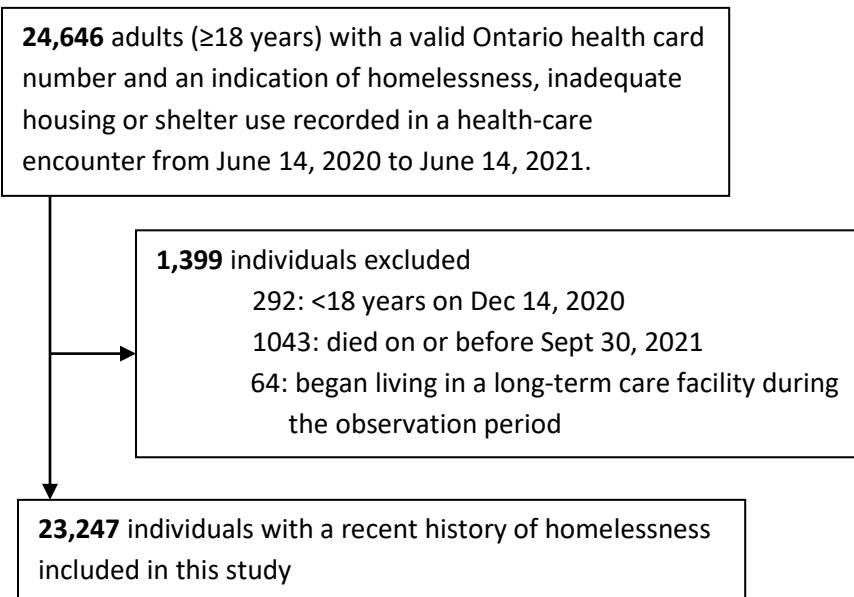

## Appendix 2: RECORD statement

The RECORD statement – checklist of items, extended from the STROBE statement, that should be reported in observational studies using routinely collected health data.

|                           | Item No. | STROBE items                                                                                                                                                                               | Location in manuscript where items are reported      | RECORD items                                                                                                                                                                                                                                                                                                                                                                                                                                | Location in manuscript where items are reported                                         |
|---------------------------|----------|--------------------------------------------------------------------------------------------------------------------------------------------------------------------------------------------|------------------------------------------------------|---------------------------------------------------------------------------------------------------------------------------------------------------------------------------------------------------------------------------------------------------------------------------------------------------------------------------------------------------------------------------------------------------------------------------------------------|-----------------------------------------------------------------------------------------|
| <b>Title and abstract</b> |          |                                                                                                                                                                                            |                                                      |                                                                                                                                                                                                                                                                                                                                                                                                                                             |                                                                                         |
|                           | 1        | (a) Indicate the study's design with a commonly used term in the title or the abstract (b) Provide in the abstract an informative and balanced summary of what was done and what was found | A) Title/abstract<br>B) Abstract methods and results | RECORD 1.1: The type of data used should be specified in the title or abstract. When possible, the name of the databases used should be included.<br><br>RECORD 1.2: If applicable, the geographic region and timeframe within which the study took place should be reported in the title or abstract.<br><br>RECORD 1.3: If linkage between databases was conducted for the study, this should be clearly stated in the title or abstract. | 1.1) Abstract (methods)<br>1.2) Title; Abstract (methods)<br>1.3) Abstract (background) |
| <b>Introduction</b>       |          |                                                                                                                                                                                            |                                                      |                                                                                                                                                                                                                                                                                                                                                                                                                                             |                                                                                         |
| Background rationale      | 2        | Explain the scientific background and rationale for the investigation being reported                                                                                                       | Introduction, par 1-2                                |                                                                                                                                                                                                                                                                                                                                                                                                                                             |                                                                                         |
| Objectives                | 3        | State specific objectives, including any prespecified hypotheses                                                                                                                           | Introduction, par 2                                  |                                                                                                                                                                                                                                                                                                                                                                                                                                             |                                                                                         |
| <b>Methods</b>            |          |                                                                                                                                                                                            |                                                      |                                                                                                                                                                                                                                                                                                                                                                                                                                             |                                                                                         |
| Study Design              | 4        | Present key elements of study design early in the paper                                                                                                                                    | Methods, "Setting and Design"                        |                                                                                                                                                                                                                                                                                                                                                                                                                                             |                                                                                         |
| Setting                   | 5        | Describe the setting, locations, and relevant dates, including periods of recruitment, exposure, follow-up, and data collection                                                            | Methods, "Setting and Design"<br>Appendix 3          |                                                                                                                                                                                                                                                                                                                                                                                                                                             |                                                                                         |

|                           |   |                                                                                                                                                                                                                                                                                                                                                                                                                                                                                                                                                                                                                                                                                                                              |                                                                        |                                                                                                                                                                                                                                                                                                                                                                                                                                                                                                                                                                                                                                                                                                      |                                                                           |
|---------------------------|---|------------------------------------------------------------------------------------------------------------------------------------------------------------------------------------------------------------------------------------------------------------------------------------------------------------------------------------------------------------------------------------------------------------------------------------------------------------------------------------------------------------------------------------------------------------------------------------------------------------------------------------------------------------------------------------------------------------------------------|------------------------------------------------------------------------|------------------------------------------------------------------------------------------------------------------------------------------------------------------------------------------------------------------------------------------------------------------------------------------------------------------------------------------------------------------------------------------------------------------------------------------------------------------------------------------------------------------------------------------------------------------------------------------------------------------------------------------------------------------------------------------------------|---------------------------------------------------------------------------|
| Participants              | 6 | <p><i>(a) Cohort study</i> - Give the eligibility criteria, and the sources and methods of selection of participants. Describe methods of follow-up</p> <p><i>Case-control study</i> - Give the eligibility criteria, and the sources and methods of case ascertainment and control selection. Give the rationale for the choice of cases and controls</p> <p><i>Cross-sectional study</i> - Give the eligibility criteria, and the sources and methods of selection of participants</p> <p><i>(b) Cohort study</i> - For matched studies, give matching criteria and number of exposed and unexposed</p> <p><i>Case-control study</i> - For matched studies, give matching criteria and the number of controls per case</p> | <p>A) Methods, “Participants”</p> <p>B) No matching criteria (N/A)</p> | <p>RECORD 6.1: The methods of study population selection (such as codes or algorithms used to identify subjects) should be listed in detail. If this is not possible, an explanation should be provided.</p> <p>RECORD 6.2: Any validation studies of the codes or algorithms used to select the population should be referenced. If validation was conducted for this study and not published elsewhere, detailed methods and results should be provided.</p> <p>RECORD 6.3: If the study involved linkage of databases, consider use of a flow diagram or other graphical display to demonstrate the data linkage process, including the number of individuals with linked data at each stage.</p> | <p>6.1) Provided in Appendix 5</p> <p>6.2) Validations are referenced</p> |
| Variables                 | 7 | Clearly define all outcomes, exposures, predictors, potential confounders, and effect modifiers. Give diagnostic criteria, if applicable.                                                                                                                                                                                                                                                                                                                                                                                                                                                                                                                                                                                    | Methods “Outcome Measures” and “Characteristics of participants”       | RECORD 7.1: A complete list of codes and algorithms used to classify exposures, outcomes, confounders, and effect modifiers should be provided. If these cannot be reported, an explanation should be provided.                                                                                                                                                                                                                                                                                                                                                                                                                                                                                      | 7.1) Provided in Appendices 4 & 5                                         |
| Data sources/ measurement | 8 | For each variable of interest, give sources of data and details of methods of assessment (measurement). Describe comparability of assessment methods if there is more than one group                                                                                                                                                                                                                                                                                                                                                                                                                                                                                                                                         | Methods “Data Sources” and Appendices 3, 4, & 5                        |                                                                                                                                                                                                                                                                                                                                                                                                                                                                                                                                                                                                                                                                                                      |                                                                           |

|                                  |    |                                                                                                                                                                                                                                                                                                                                                                                                                                                                                                                                                                      |                                |                                                                                                                                                                                                                                                                     |                                                                   |
|----------------------------------|----|----------------------------------------------------------------------------------------------------------------------------------------------------------------------------------------------------------------------------------------------------------------------------------------------------------------------------------------------------------------------------------------------------------------------------------------------------------------------------------------------------------------------------------------------------------------------|--------------------------------|---------------------------------------------------------------------------------------------------------------------------------------------------------------------------------------------------------------------------------------------------------------------|-------------------------------------------------------------------|
| Bias                             | 9  | Describe any efforts to address potential sources of bias                                                                                                                                                                                                                                                                                                                                                                                                                                                                                                            | N/A                            |                                                                                                                                                                                                                                                                     |                                                                   |
| Study size                       | 10 | Explain how the study size was arrived at                                                                                                                                                                                                                                                                                                                                                                                                                                                                                                                            | N/A                            |                                                                                                                                                                                                                                                                     |                                                                   |
| Quantitative variables           | 11 | Explain how quantitative variables were handled in the analyses. If applicable, describe which groupings were chosen, and why                                                                                                                                                                                                                                                                                                                                                                                                                                        | Appendices 4 &5                |                                                                                                                                                                                                                                                                     |                                                                   |
| Statistical methods              | 12 | (a) Describe all statistical methods, including those used to control for confounding<br>(b) Describe any methods used to examine subgroups and interactions<br>(c) Explain how missing data were addressed<br>(d) <i>Cohort study</i> - If applicable, explain how loss to follow-up was addressed<br><i>Case-control study</i> - If applicable, explain how matching of cases and controls was addressed<br><i>Cross-sectional study</i> - If applicable, describe analytical methods taking account of sampling strategy<br>(e) Describe any sensitivity analyses | Methods "Statistical Analysis" |                                                                                                                                                                                                                                                                     |                                                                   |
| Data access and cleaning methods |    | ..                                                                                                                                                                                                                                                                                                                                                                                                                                                                                                                                                                   |                                | <p>RECORD 12.1: Authors should describe the extent to which the investigators had access to the database population used to create the study population.</p> <p>RECORD 12.2: Authors should provide information on the data cleaning methods used in the study.</p> | <p>12.1) Methods "Setting and Design"</p> <p>12.2) Appendix 3</p> |

|                  |    |                                                                                                                                                                                                                                                                                                                                                 |                            |                                                                                                                                                                                                                                                                                                                    |                                                         |
|------------------|----|-------------------------------------------------------------------------------------------------------------------------------------------------------------------------------------------------------------------------------------------------------------------------------------------------------------------------------------------------|----------------------------|--------------------------------------------------------------------------------------------------------------------------------------------------------------------------------------------------------------------------------------------------------------------------------------------------------------------|---------------------------------------------------------|
| Linkage          |    | ..                                                                                                                                                                                                                                                                                                                                              |                            | RECORD 12.3: State whether the study included person-level, institutional-level, or other data linkage across two or more databases. The methods of linkage and methods of linkage quality evaluation should be provided.                                                                                          | 12.3) Methods “Setting and Design”, Appendices 3, 4 & 5 |
| <b>Results</b>   |    |                                                                                                                                                                                                                                                                                                                                                 |                            |                                                                                                                                                                                                                                                                                                                    |                                                         |
| Participants     | 13 | (a) Report the numbers of individuals at each stage of the study ( <i>e.g.</i> , numbers potentially eligible, examined for eligibility, confirmed eligible, included in the study, completing follow-up, and analysed)<br>(b) Give reasons for non-participation at each stage.<br>(c) Consider use of a flow diagram                          | Results; Appendix 1        | RECORD 13.1: Describe in detail the selection of the persons included in the study ( <i>i.e.</i> , study population selection) including filtering based on data quality, data availability and linkage. The selection of included persons can be described in the text and/or by means of the study flow diagram. | 13.1) Results; Appendix 1                               |
| Descriptive data | 14 | (a) Give characteristics of study participants ( <i>e.g.</i> , demographic, clinical, social) and information on exposures and potential confounders<br>(b) Indicate the number of participants with missing data for each variable of interest<br>(c) <i>Cohort study</i> - summarise follow-up time ( <i>e.g.</i> , average and total amount) | Results; Table 1           |                                                                                                                                                                                                                                                                                                                    |                                                         |
| Outcome data     | 15 | <i>Cohort study</i> - Report numbers of outcome events or summary measures over time<br><i>Case-control study</i> - Report numbers in each exposure category, or summary measures of exposure                                                                                                                                                   | Results; Table 1, Figure 2 |                                                                                                                                                                                                                                                                                                                    |                                                         |

|                   |    |                                                                                                                                                                                                                                                                                                                                                                                                                 |                            |                                                                                                                                                                                                                                                                                                          |                                   |
|-------------------|----|-----------------------------------------------------------------------------------------------------------------------------------------------------------------------------------------------------------------------------------------------------------------------------------------------------------------------------------------------------------------------------------------------------------------|----------------------------|----------------------------------------------------------------------------------------------------------------------------------------------------------------------------------------------------------------------------------------------------------------------------------------------------------|-----------------------------------|
|                   |    | <i>Cross-sectional study</i> - Report numbers of outcome events or summary measures                                                                                                                                                                                                                                                                                                                             |                            |                                                                                                                                                                                                                                                                                                          |                                   |
| Main results      | 16 | (a) Give unadjusted estimates and, if applicable, confounder-adjusted estimates and their precision (e.g., 95% confidence interval). Make clear which confounders were adjusted for and why they were included<br>(b) Report category boundaries when continuous variables were categorized<br>(c) If relevant, consider translating estimates of relative risk into absolute risk for a meaningful time period | Results; Table 3, Figure 3 |                                                                                                                                                                                                                                                                                                          |                                   |
| Other analyses    | 17 | Report other analyses done— e.g., analyses of subgroups and interactions, and sensitivity analyses                                                                                                                                                                                                                                                                                                              | N/A                        |                                                                                                                                                                                                                                                                                                          |                                   |
| <b>Discussion</b> |    |                                                                                                                                                                                                                                                                                                                                                                                                                 |                            |                                                                                                                                                                                                                                                                                                          |                                   |
| Key results       | 18 | Summarise key results with reference to study objectives                                                                                                                                                                                                                                                                                                                                                        | Discussion,                |                                                                                                                                                                                                                                                                                                          |                                   |
| Limitations       | 19 | Discuss limitations of the study, taking into account sources of potential bias or imprecision. Discuss both direction and magnitude of any potential bias                                                                                                                                                                                                                                                      | Discussion                 | RECORD 19.1: Discuss the implications of using data that were not created or collected to answer the specific research question(s). Include discussion of misclassification bias, unmeasured confounding, missing data, and changing eligibility over time, as they pertain to the study being reported. | Discussion, limitations paragraph |
| Interpretation    | 20 | Give a cautious overall interpretation of results considering objectives, limitations, multiplicity of analyses, results from similar                                                                                                                                                                                                                                                                           | Discussion                 |                                                                                                                                                                                                                                                                                                          |                                   |

|                                                           |    |                                                                                                                                                               |                              |                                                                                                                                                          |                         |
|-----------------------------------------------------------|----|---------------------------------------------------------------------------------------------------------------------------------------------------------------|------------------------------|----------------------------------------------------------------------------------------------------------------------------------------------------------|-------------------------|
|                                                           |    | studies, and other relevant evidence                                                                                                                          |                              |                                                                                                                                                          |                         |
| Generalisability                                          | 21 | Discuss the generalisability (external validity) of the study results                                                                                         | Discussion                   |                                                                                                                                                          |                         |
| <b>Other Information</b>                                  |    |                                                                                                                                                               |                              |                                                                                                                                                          |                         |
| Funding                                                   | 22 | Give the source of funding and the role of the funders for the present study and, if applicable, for the original study on which the present article is based | Acknowledgements;<br>Methods |                                                                                                                                                          |                         |
| Accessibility of protocol, raw data, and programming code |    | ..                                                                                                                                                            |                              | RECORD 22.1: Authors should provide information on how to access any supplemental information such as the study protocol, raw data, or programming code. | Data sharing statement. |

\*Reference: Benchimol EI, Smeeth L, Guttman A, Harron K, Moher D, Petersen I, Sørensen HT, von Elm E, Langan SM, the RECORD Working Committee. The Reporting of studies Conducted using Observational Routinely-collected health Data (RECORD) Statement. *PLoS Medicine* 2015; in press.

\*Checklist is protected under Creative Commons Attribution ([CC BY](https://creativecommons.org/licenses/by/4.0/)) license.



### Appendix 3: Data source descriptions

All data used in this study were accessed at ICES ([www.ices.on.ca](http://www.ices.on.ca)), an independent, non-profit organization that uses routinely collected health administrative data to conduct health services and population health outcomes research. All residents of Ontario are included in Ontario's health, administrative data, and >99% of residents have a health card which is presented at each healthcare encounter. ICES links records within and across datasets using encrypted Ontario health card numbers. A more fulsome description of ICES, its governance structure and linkage practices are available elsewhere<sup>1</sup>.

| Name                                                                               | Data Provider                                    | Description                                                                                                                                                                                                                                                                                                                                                                                                                                                                                                                                                                                                                                                                                                                                                                                                                                                                                                                          |
|------------------------------------------------------------------------------------|--------------------------------------------------|--------------------------------------------------------------------------------------------------------------------------------------------------------------------------------------------------------------------------------------------------------------------------------------------------------------------------------------------------------------------------------------------------------------------------------------------------------------------------------------------------------------------------------------------------------------------------------------------------------------------------------------------------------------------------------------------------------------------------------------------------------------------------------------------------------------------------------------------------------------------------------------------------------------------------------------|
| <b>Canadian Institute for Health Information Discharge Abstract Database (DAD)</b> | Canadian Institute for Health Information (CIHI) | The DAD contains administrative, clinical (diagnoses and procedures/interventions), demographic, and administrative information from the chart abstraction of all admissions to acute care hospitals in Ontario. Records are sent from hospitals to the Canadian Institute for Health Information, where it is validated and cleaned before being sent to ICES for use in healthcare administrative research. At ICES, consecutive DAD records are linked together to form 'episodes of care' among the hospitals to which patients have been transferred after their initial admission. Similarly, it is possible to link all admissions for a given patient (or admissions to other data at ICES) using the individual's encrypted health card number. Although it is usually updated every quarter, since the start of the pandemic ICES has received more timely updates (up to weekly) to facilitate pandemic-related research. |
| <b>Canadian Institute for Health Information Same Day Surgery (SDS)</b>            | Canadian Institute for Health Information (CIHI) | The SDS contains chart abstraction information for all same-day surgeries performed at acute care hospitals in Ontario. Every record corresponds to one same-day surgery or procedure stay. All records for an individual can be linked internally or with other datasets at ICES using the individual's encrypted health card number. Like with the DAD, records are sent from hospitals to the Canadian Institute for Health Information, where it is validated and cleaned before being sent to ICES for use in healthcare administrative research. Although it is usually updated every quarter, since the start of the pandemic ICES has received more timely updates (up to weekly) to facilitate pandemic-related research.                                                                                                                                                                                                   |

| Name                                                     | Data Provider                                    | Description                                                                                                                                                                                                                                                                                                                                                                                                                                                                                                                                                                                                                                                                                                                                                                                                                                                                                                                                                                                                     |
|----------------------------------------------------------|--------------------------------------------------|-----------------------------------------------------------------------------------------------------------------------------------------------------------------------------------------------------------------------------------------------------------------------------------------------------------------------------------------------------------------------------------------------------------------------------------------------------------------------------------------------------------------------------------------------------------------------------------------------------------------------------------------------------------------------------------------------------------------------------------------------------------------------------------------------------------------------------------------------------------------------------------------------------------------------------------------------------------------------------------------------------------------|
| <b>National Ambulatory Care Reporting System (NACRS)</b> | Canadian Institute for Health Information (CIHI) | <p>The NACRS contains administrative, clinical (diagnoses and procedures), demographic, and administrative information for all patient visits made to hospital- and community-based ambulatory care centres (emergency departments, day surgery units, hemodialysis units, and cancer care clinics) in Ontario. Records are sent from hospitals to the Canadian Institute for Health Information, where it is validated and cleaned before being sent to ICES for use in healthcare administrative research. At ICES, NACRS records are linked with other data sources (DAD, Ontario Mental Health Reporting System [OMHRS]) to identify transitions to other care settings, such as inpatient acute care or psychiatric care, and can be linked to other ICES data using the individual’s encrypted health card number.</p> <p>Although it is usually updated every quarter, since the start of the pandemic ICES has received more timely updates (up to weekly) to facilitate pandemic-related research.</p> |
| <b>Ontario Mental Health Reporting System (OMHRS)</b>    | Canadian Institute for Health Information (CIHI) | <p>The OMHRS contains administrative, clinical (diagnoses and procedures), demographic, and administrative information from the chart abstraction of all admissions to adult designated inpatient mental health beds across Ontario. This includes beds in general hospitals, provincial psychiatric facilities, and specialty psychiatric facilities. Clinical assessment data is ascertained using the Resident Assessment Instrument for Mental Health (RAI-MH). Multiple assessments may occur during the length of a mental health admission. Records are sent from eligible hospitals to the Canadian Institute for Health Information, where it is validated and cleaned before being sent to ICES for use in healthcare administrative research. At ICES, OMHRS records are linked with other data sources using the individual’s encrypted health card number. OMHRS data is updated quarterly.</p>                                                                                                    |

| Name                                                | Data Provider                            | Description                                                                                                                                                                                                                                                                                                                                                                                                                                                                                                                                                                                                                                                                                                                                                                                                                                                                                                                                                                                                                                                                                    |
|-----------------------------------------------------|------------------------------------------|------------------------------------------------------------------------------------------------------------------------------------------------------------------------------------------------------------------------------------------------------------------------------------------------------------------------------------------------------------------------------------------------------------------------------------------------------------------------------------------------------------------------------------------------------------------------------------------------------------------------------------------------------------------------------------------------------------------------------------------------------------------------------------------------------------------------------------------------------------------------------------------------------------------------------------------------------------------------------------------------------------------------------------------------------------------------------------------------|
| <b>Community Health Centre</b>                      | Alliance for Healthier Communities       | <p>Community health centres (CHC) deliver primary care services in combination with health promotion and illness prevention services in Ontario, primarily in high need areas to individuals who do not have a health care provider, are newcomers to Canada, face barriers to care, have mental health or addiction issues, require counseling or help with housing issues, and/or have no health insurance in Ontario. Care is provided by physicians, nurse practitioners, nurses, counsellors, community workers, and dietitians. The Community Health Centre dataset includes chart abstracted records for all visits in all such centres across Ontario.</p> <p>The dataset is compiled and validated by the Alliance for Healthier Communities before being sent to ICES for use in healthcare research. Data is updated annually and records are linked using individuals encrypted health card numbers.</p> <p>None of the care provided by CHCs is captured in OHIP and thus CHC data represents a separate source of primary care access, particularly by vulnerable Ontarians.</p> |
| <b>Ontario Laboratory Information System (OLIS)</b> | Ministry of Health eHealth Ontario       | The OLIS contains lab orders, test requests and lab results from most laboratories in Ontario. Starting April 7 2020, ICES began receiving daily cumulative updates of COVID-19 test orders from eHealth Ontario (eHO, now part of Ontario Health Digital Health Services). These data are a minimum dataset extracted from lab orders with COVID-19-specific test request (TR) or LOINC codes and other TR/LOINC codes indicative of viral or respiratory virus testing. Each record represents a testing event, with testing events linkable by encrypted individual health card numbers.                                                                                                                                                                                                                                                                                                                                                                                                                                                                                                    |
| <b>COVAXON</b>                                      | Ministry of Health Public Health Ontario | COVAXON is the central provincial database developed as a point-of-care system to support COVID-19 vaccination in Ontario. The Ministry of Health compiles and manages these data and Public Health Ontario provide ICES with a client-level dataset detailing vaccination records. Each record represents one individual. While vaccination records have been cleaned using data cleaning logic, in instances where multiple records remain present for an individual, the records are reconciled manually based on the most likely scenario (1. 2 <sup>nd</sup> record represents a second vaccination event [ie. 2 <sup>nd</sup> dose]; 2. Repeat record; 3. Incorrectly entered identifier (in which case the earliest record was selected))                                                                                                                                                                                                                                                                                                                                               |

| Name                                        | Data Provider      | Description                                                                                                                                                                                                                                                                                                                                                                                                                                                                                                                                                                                                                                                                |
|---------------------------------------------|--------------------|----------------------------------------------------------------------------------------------------------------------------------------------------------------------------------------------------------------------------------------------------------------------------------------------------------------------------------------------------------------------------------------------------------------------------------------------------------------------------------------------------------------------------------------------------------------------------------------------------------------------------------------------------------------------------|
| <b>OHIP Registered Persons Database</b>     | Ministry of Health | The OHIP RPDB contains basic demographic information (age, sex, location of residence, date of birth, and date of death for deceased individuals) for all individuals ever issued an Ontario health insurance number. The RPDB also indicates time periods for which an individual was eligible to receive publicly funded health insurance benefits and provides the best-known postal code for each registrant on July 1st of each year. This data is updated yearly by the Ministry of Health. Each record represents one individual and is linkable to all other ICES data holdings using the encrypted health card number.                                            |
| <b>Ontario Health Insurance Plan (OHIP)</b> | Ministry of Health | The OHIP claims database contains information pertaining to inpatient and outpatient services provided to Ontario residents eligible for the province's publicly funded health insurance system by fee-for-service health care practitioners (primarily physicians) and "shadow billings" for those paid through non-fee-for-service payment plans.<br>Billing codes on the claims (OHIP fee codes) identify the care provider, their area of specialization and the type and location of service. OHIP billing claims also contain a 3-digit diagnosis code - the main reason for the service - captured using a modified version of the ICD, 8th revision coding system. |
| <b>Ontario Drug Benefit (ODB) database</b>  | Ministry of Health | The Ontario Drug Benefit (ODB) database, updated monthly, contains claims for prescription drugs received under the Ontario Drug Benefit program, which covers Ontarians over 65 years old as well as participants from eligible programs like Ontario Works (which provides financial and employment assistance for Ontarians in need) or the Ontario Disability Support Program (which provides financial and employment assistance for Ontarians with a disability). This database also includes a flag for individuals receiving prescriptions while in a long-term care facility.                                                                                     |
| <b>PCCF+</b>                                | Statistics Canada  | The Postal Code Conversion File plus (PCCF+) provides a conversion template between Canada Post six-character postal codes and Statistics Canada's standard geographic areas. Through the link between postal codes and standard geographic areas, the PCCF permits the integration of data from various sources that are otherwise incompatible. It also permits the calculation of socioeconomic status proxies, such as neighbourhood-level income quintiles.                                                                                                                                                                                                           |

| Name                                                        | Data Provider                                    | Description                                                                                                                                                                                                                                                                                                                                                                                                                                                                                                                                                                                                                                                                                                                                                                                                                                                                                                                                                                                                                                                                                                                                                                                                                                                                                                                                                                                                                                                                                                                                                                                                                                                                                                  |
|-------------------------------------------------------------|--------------------------------------------------|--------------------------------------------------------------------------------------------------------------------------------------------------------------------------------------------------------------------------------------------------------------------------------------------------------------------------------------------------------------------------------------------------------------------------------------------------------------------------------------------------------------------------------------------------------------------------------------------------------------------------------------------------------------------------------------------------------------------------------------------------------------------------------------------------------------------------------------------------------------------------------------------------------------------------------------------------------------------------------------------------------------------------------------------------------------------------------------------------------------------------------------------------------------------------------------------------------------------------------------------------------------------------------------------------------------------------------------------------------------------------------------------------------------------------------------------------------------------------------------------------------------------------------------------------------------------------------------------------------------------------------------------------------------------------------------------------------------|
| <b>Chronic Obstructive Pulmonary Disease (COPD) dataset</b> | Canadian Institute for Health Information (CIHI) | <p>The Ontario COPD Database is created using two separate algorithms applied to inpatient hospitalization (DAD), same day surgery (SDS) records, and physician billing claims (OHIP) data to determine the diagnosis date for incident cases of chronic obstructive pulmonary disease in Ontario.</p> <p>In an algorithm which maximizes sensitivity, the definition for COPD is any physician billing claim with a diagnosis for COPD (OHIP diagnosis codes: 491, 492, 496) or any inpatient hospitalization or same day surgery record with a diagnosis for COPD (ICD-9 diagnosis codes: 491, 492, 496; ICD-10 diagnosis codes: J41- J44; in any diagnostic code space). When using expert panel review of primary care charts as the reference standard, this definition has been shown to have the following performance characteristics: Sensitivity (85.0%), Specificity (78.4%), Positive Predictive Value (57.5%), and Negative Predictive Value (93.8%).(2)</p> <p>In an algorithm which maximizes specificity, the definition for COPD is <math>\geq 3</math> physician billing claims with a diagnosis for COPD (OHIP diagnosis codes: 491, 492, 496) or <math>\geq 1</math> inpatient hospitalization or same day surgery record with a diagnosis for COPD (ICD-9 diagnosis codes: 491, 492, 496; ICD-10 diagnosis codes: J41, J42, J43, J44; in any diagnostic code space) in a two-year period. When using expert panel review of primary care charts as the reference standard, this definition has been shown to have the following performance characteristics: Sensitivity (57.5%), Specificity (95.4%), Positive Predictive Value (81.3%), and Negative Predictive Value (86.7%).(2)</p> |
| <b>Ontario Asthma dataset</b>                               | Canadian Institute for Health Information (CIHI) | <p>The Ontario Asthma Database is created using two separate algorithms applied to inpatient hospitalization (DAD), same day surgery (SDS) records, and physician billing claims (OHIP) data to determine the diagnosis date for incident cases of asthma in Ontario.</p> <p>In the algorithm which maximized sensitivity, the definition for Asthma is receipt of one hospital admission with an asthma diagnosis or two OHIP claims with asthma diagnosis within two years. This definition has been shown to have the following performance characteristics in adults: Sensitivity (80.6%), Specificity (81.4%), Positive Predictive Value (72.5%), and Negative Predictive Value (87.3%).(3)</p>                                                                                                                                                                                                                                                                                                                                                                                                                                                                                                                                                                                                                                                                                                                                                                                                                                                                                                                                                                                                         |

| Name                                   | Data Provider                                    | Description                                                                                                                                                                                                                                                                                                                                                                                                                                                                                                                                                                                                                                                                                                                                                                                                                                                                                                                                                                                                                                                                             |
|----------------------------------------|--------------------------------------------------|-----------------------------------------------------------------------------------------------------------------------------------------------------------------------------------------------------------------------------------------------------------------------------------------------------------------------------------------------------------------------------------------------------------------------------------------------------------------------------------------------------------------------------------------------------------------------------------------------------------------------------------------------------------------------------------------------------------------------------------------------------------------------------------------------------------------------------------------------------------------------------------------------------------------------------------------------------------------------------------------------------------------------------------------------------------------------------------------|
| <b>Ontario Diabetes Database (ODD)</b> | Canadian Institute for Health Information (CIHI) | <p>The ODD is created using algorithms applied to inpatient hospitalization (DAD) records, same day surgery (SDS) records, and physician billing claims (OHIP) data to determine the diagnosis date for incident cases of diabetes in Ontario. For adults aged 19 years and greater, the definition for diabetes is 2 physician billing claims with a diagnosis for diabetes (OHIP diagnosis code: 250) or 1 inpatient hospitalization or same day surgery record with a diagnosis for diabetes (ICD-9 diagnosis code: 250; ICD-10 diagnosis codes: E10, E11, E13, E14; in any diagnostic code space) within a 2-year period. Physician claims and hospitalizations with a diagnosis of diabetes occurring within 120 prior to and 180 days after a gestational hospitalization record were excluded. When using primary care chart abstraction as the reference standard, this definition has been shown to have the following performance characteristics: Sensitivity (86.1%), Specificity (97.1%), Positive Predictive Value (79.8%), and Negative Predictive Value (98.1%).(4)</p> |
| <b>Ontario CHF Database (CHF)</b>      | Canadian Institute for Health Information (CIHI) | <p>The Ontario CHF Database is created using a definition of <math>\geq 2</math> physician billing claims with a diagnosis of congestive heart failure (OHIP diagnosis code: 428) and/or <math>\geq 1</math> inpatient hospitalization or same day surgery record with a diagnosis of congestive heart failure (ICD-9 diagnosis code: 428; ICD-10 diagnosis code: I50; in the primary diagnostic code space) in a two-year period applied to hospitalization (DAD), same day surgery (SDS), and physician billing claims (OHIP) data to determine the diagnosis date for incident cases of CHF in Ontario.</p> <p>When using electronic medical record data abstraction as the reference standard, the above definition has been demonstrated to have the following performance characteristics: Sensitivity (84.8%), Specificity (97.0%), and Positive Predictive Value (55.3%).(5)</p>                                                                                                                                                                                                |

| Name                                | Data Provider | Description                                                                                                                                                                                                                                                                                                                                                                                                                                                                                                                                                                                                                                                                                                                                                                                                                                                             |
|-------------------------------------|---------------|-------------------------------------------------------------------------------------------------------------------------------------------------------------------------------------------------------------------------------------------------------------------------------------------------------------------------------------------------------------------------------------------------------------------------------------------------------------------------------------------------------------------------------------------------------------------------------------------------------------------------------------------------------------------------------------------------------------------------------------------------------------------------------------------------------------------------------------------------------------------------|
| <b>Ontario Hypertension dataset</b> | ICES          | <p>The Ontario hypertension Dataset contains all Ontario hypertension patients identified since 1991. The case definition is one hospital admission/SDS record with a hypertension diagnosis (ICD 9 dxcodes: 401x, 402x, 403x, 404x, 405x or ICD 10 dx10codes: I10, I11, I12, I13, I15), or 1 OHIP claim (401, 402, 403, 404, or 405) with a hypertension diagnosis followed by either an OHIP claim or a hospital admission/SDS record with a hypertension diagnosis within two years. If the hypertension record is between 120 days before and 180 days after a gestational admission date, the hypertension record was considered to be gestational hypertension, and was excluded.</p> <p>This definition has been shown to have the following performance characteristics in adults: Sensitivity (72%), Specificity (95%), Positive Predictive Value (87%)(6)</p> |
| <b>Ontario Dementia Dataset</b>     | ICES          | <p>The Ontario Dementia Dataset contains all Ontario patients who were identified as having Alzheimer's or related dementia in ICES data holdings between the ages of 40 and 110 years. The case definition is <math>\geq 3</math> physician billing claims with a dementia diagnosis at least 30 days apart in a 2 year period, or one hospitalization or same day surgery with a dementia diagnosis recorded, or at least one prescription claim in ODB with a dementia medication.</p> <p>This definition has been shown to have the following performance characteristics in adults: Sensitivity (79.3%), Specificity (99.1%), Positive Predictive Value (80.4%)(7)</p>                                                                                                                                                                                             |

| Name                                 | Data Provider | Description                                                                                                                                                                                                                                                                                                                                                                                                                                                                                                                                                                                                                                                                                                                                                                                                                                                                                                                                                                                                                                                                                                                                                                                                      |
|--------------------------------------|---------------|------------------------------------------------------------------------------------------------------------------------------------------------------------------------------------------------------------------------------------------------------------------------------------------------------------------------------------------------------------------------------------------------------------------------------------------------------------------------------------------------------------------------------------------------------------------------------------------------------------------------------------------------------------------------------------------------------------------------------------------------------------------------------------------------------------------------------------------------------------------------------------------------------------------------------------------------------------------------------------------------------------------------------------------------------------------------------------------------------------------------------------------------------------------------------------------------------------------|
| Ontario Rheumatoid Arthritis Dataset | ICES          | <p>The Ontario Rheumatoid Arthritis Dataset (ORAD) contains all Ontario rheumatoid arthritis patients identified since 1991. The case definition is <math>\geq 3</math> physician billing claims, and at least 1 claim billed by a musculoskeletal specialist, with a diagnosis of rheumatoid arthritis (OHIP diagnosis code: 714) and/or <math>\geq 1</math> inpatient hospitalization or same day surgery record with a diagnosis of rheumatoid arthritis (ICD-9 diagnosis code: 714; ICD-10 diagnosis codes: M05, M06; in any diagnostic code space) in a two-year period applied to hospitalization (DAD), same day surgery (SDS), and physician billing claims (OHIP) data to determine the diagnosis date for incident cases of rheumatoid arthritis in Ontario.</p> <p>When using rheumatologist-confirmed diagnosis as the reference standard, this definition has been shown to have the following performance characteristics: Sensitivity (97%), Specificity (85%), Positive Predictive Value (76%), and Negative Predictive Value (98%).(13) Using primary care records as the reference standard, the performance statistics were: Sensitivity 78%, Specificity 100%, PPV 78%, and NPV 100%.(8)</p> |

---



| Name                                               | Data Provider | Description                                                                                                                                                                                                                                                                                                                                                                                                                                                                                                                                                                                                                                                                                                                                                                                                                                                                                                                                                                                                                                                                                                                                                                                                                                                                                                                                                                                                                                                                                                                                 |
|----------------------------------------------------|---------------|---------------------------------------------------------------------------------------------------------------------------------------------------------------------------------------------------------------------------------------------------------------------------------------------------------------------------------------------------------------------------------------------------------------------------------------------------------------------------------------------------------------------------------------------------------------------------------------------------------------------------------------------------------------------------------------------------------------------------------------------------------------------------------------------------------------------------------------------------------------------------------------------------------------------------------------------------------------------------------------------------------------------------------------------------------------------------------------------------------------------------------------------------------------------------------------------------------------------------------------------------------------------------------------------------------------------------------------------------------------------------------------------------------------------------------------------------------------------------------------------------------------------------------------------|
| <b>Ontario Crohn's and Colitis Cohort Database</b> | ICES          | <p>The Ontario Crohn's and Colitis Cohort Database (OCCC) includes all Ontario patients who were identified with Crohn's disease or Ulcerative Colitis which means Inflammatory Bowel Disease (IBD) when they were aged 0-105 years. The case definition for adults (18+) is one of the following:</p> <ul style="list-style-type: none"> <li>a) At least two years of OHIP eligibility AND <math>\geq 5</math> health contacts including hospital admissions/OHIP claims/NACRS visits with IBD diagnosis within four years, or</li> <li>b) &lt;two years of OHIP eligibility AND <math>\geq 3</math> hospital admissions/OHIP claims/NACRS visits with IBD diagnosis</li> </ul> <p>The case definition for elderly (65+ years) patients is one of the following:</p> <ul style="list-style-type: none"> <li>a) at least two years of OHIP eligibility AND <math>\geq 5</math> health contacts including hospital admissions/OHIP claims/NACRS visits with IBD diagnosis within four years AND <math>\geq 1</math> ODB claim with IBD medication , or</li> <li>b) &lt;two years of OHIP eligibility AND <math>\geq 3</math> hospital admissions/OHIP claims/NACRS visits with IBD diagnosis AND <math>\geq 1</math> ODB claim with IBD medication</li> </ul> <p>This definition has been shown to have the following performance characteristics in adults: Sensitivity (76.8%), Specificity (96.2%), Positive Predictive Value (81.4%); and in elderly: Sensitivity (59.3%), Specificity (99.0%), Positive Predictive Value (71.1%)(9)</p> |
| <b>Ontario HIV Database</b>                        | ICES          | <p>The Ontario HIV Database contains all Ontario patients identified as having HIV. The case definition is <math>\geq 1</math> hospitalization (ICD-10 codes: B20-B24) or <math>\geq 3</math> physician billing claims with a diagnosis of HIV (OHIP diagnosis codes: 042-044) in a three-year period applied to physician billing claims (OHIP) data to determine the diagnosis date for incident cases of HIV in Ontario.</p> <p>When using primary care chart abstraction as the reference standard, the above definition has been demonstrated to have the following performance characteristics: Sensitivity (96.2%) and Specificity (99.6%).(10)</p>                                                                                                                                                                                                                                                                                                                                                                                                                                                                                                                                                                                                                                                                                                                                                                                                                                                                                  |

## Appendix 4: Case definition of recent history of homelessness

Any record between June 14, 2020 and June 14, 2021 from any of the below databases that includes any of the positive (“homeless”) indicator values is sufficient evidence to indicate an individual had a recent history of homelessness (IRHH). This case definition is adapted from Richard et al 2019 (citation below). In this validation, it is noted that because sensitivity is moderate, records without evidence of homelessness cannot be interpreted as evidence for *not* being homeless. Further, as individuals may transition across states of housing and homelessness, and their housing status can only be captured when accessing specific health services, the algorithm has demonstrated poor precision in capturing homelessness at a specific point in time. Therefore, individuals captured using this algorithm are more accurately referred to as “individuals with a recent history of homelessness”. Since completion of the validation work, the Canadian Institute for Health Information has made it mandatory for hospital coders to indicate homelessness where evidence is present in the chart (since 2018)<sup>11-12</sup>.

| Database     | Variable Name                   | Indicator Value  | Description                                                                                          |
|--------------|---------------------------------|------------------|------------------------------------------------------------------------------------------------------|
| <b>DAD</b>   | INSTTYPE                        | “SH”             | Institution Type = Supportive Housing                                                                |
|              | DX10CODE1 to DX10CODE25         | “Z590” or “Z591” | ICD-10 diagnosis codes for “Homelessness” and “Inadequate housing”                                   |
|              | CMGDIAG                         | “Z590” or “Z591” | ICD-10 diagnosis codes for “Homelessness” and “Inadequate housing”                                   |
|              | PSTLCODE                        | “XX”             | Used in earlier years to indicate transient/homeless patients and still occasionally seen in records |
| <b>NACRS</b> | DX10CODE1 to DX10CODE10         | “Z590” or “Z591” | ICD-10 diagnosis codes for “Homelessness” and “Inadequate housing”                                   |
|              | RESTYPE                         | “3” or “4”       | Residence Type = “Homeless” or “Shelter”                                                             |
|              | PSTLCODE                        | “XX”             | Used in earlier years to indicate transient/homeless patients and still occasionally seen in records |
| <b>OMHRS</b> | PREDX10CODE to PREDX10CODE11    | “Z590” or “Z591” | ICD-10 diagnosis codes for “Homelessness” and “Inadequate housing”                                   |
|              | POSTDX10CODE1 to POSTDX10CODE24 | “Z590” or “Z591” | ICD-10 diagnosis codes for “Homelessness” and “Inadequate housing”                                   |
|              | PRIOR_RESIDENCE                 | “6”              | Prior residential status = “Homeless (with or without shelter)”                                      |
|              | USUAL_RESIDENCE                 | “8”              | Usual residential status = “Homeless (with or without shelter)”                                      |
|              | ADMITFROM                       | “8”              | Admitted from = “Homeless (with or without shelter)”                                                 |
|              | DISCHLIVING                     | “8”              | Living arrangement at discharge = “Homeless (with or without shelter)”                               |
|              | P5_Retired_2009                 | “6”              | (Variable retired in 2009) Living arrangement = “Homeless (with or without shelter)”                 |
|              | PSTLCODE                        | “XX”             | Used in earlier years to indicate transient/homeless patients and still occasionally seen in records |
| <b>CHC</b>   | ICD10_code                      | “Z590” or “Z591” | ICD-10 diagnosis codes for “Homelessness” and “Inadequate housing”                                   |

ICD=International Classification of Diseases. Case definition adapted from: Richard, L., Hwang, S. W., Forchuk, C., Nisenbaum, R., Clemens, K., Wiens, K., ... & Shariff, S. Z. (2019). Validation study of health administrative data algorithms to identify individuals experiencing homelessness and estimate population prevalence of homelessness in Ontario, Canada. *BMJ open*, 9(10), e030221.

## Appendix 5: Variable definitions

| Variable                                                                 | Data Source                      | Definition Description                                                                                                                                                                                                                                                                                                                                                                                                                                                                                                  |
|--------------------------------------------------------------------------|----------------------------------|-------------------------------------------------------------------------------------------------------------------------------------------------------------------------------------------------------------------------------------------------------------------------------------------------------------------------------------------------------------------------------------------------------------------------------------------------------------------------------------------------------------------------|
| Age as of Dec 14, 2020                                                   | RPDB                             | Age of the individual at index, calculated from the date of birth recorded on the individual's health card. Categories for this variable include: 18-29 years (reference); 30-39 years; 40-49 years; 50-59 years; and 60 years and older.                                                                                                                                                                                                                                                                               |
| Sex as of Dec 14, 2020                                                   | RPDB                             | Biological sex of the individual as recorded in the individual's health card. Reference category=Male                                                                                                                                                                                                                                                                                                                                                                                                                   |
| Level of urbanicity as of Dec 14, 2020                                   | PCCF                             | Adapted from CSIZEMIZ variable which categorizes individuals based on presence and size of census metropolitan area (CSIZE), using the best available postal code for the individual at index. Medium and small CMAs (0-500K pop) are grouped together, as are non-CMA areas. Categories include Large CMA (over 500K population)(reference category); Small to medium CMA (0-500K population); and non-CMA areas.<br><br>Relies on best known postal code of the individual, which may not be current and/or accurate. |
| Method of identification as IRHH between June 14, 2020 and June 14, 2021 | DAD/SDS<br>NACRS<br>OMHRS<br>CHC | Method of identification as IRHH: through the CHC and/or hospital-based databases; or through hospital-based encounters only. Reference category=Hospital-based encounter only                                                                                                                                                                                                                                                                                                                                          |
| Chronic obstructive pulmonary disease by Dec 14, 2020                    | COPD <sup>2</sup><br>CHC         | Inclusion in the database or where ICD10 code (J41-J44) present in a CHC record before index indicates the individual has a history of COPD                                                                                                                                                                                                                                                                                                                                                                             |
| Asthma by Dec 14, 2020                                                   | ASTHMA <sup>3</sup><br>CHC       | Inclusion in the database or where ICD10 code (J45-J46) present in a CHC record before index indicates the individual has a history of asthma                                                                                                                                                                                                                                                                                                                                                                           |
| Diabetes by Dec 14, 2020                                                 | ODD <sup>4</sup><br>CHC          | Inclusion in the database or where ICD10 code (E10-E14) present in a CHC record before index indicates the individual has a history of diabetes                                                                                                                                                                                                                                                                                                                                                                         |
| Congestive heart failure by Dec 14, 2020                                 | CHF <sup>5</sup><br>CHC          | Inclusion in the database or where ICD10 code (I500 I501 I509) present in a CHC record before index indicates the individual has a history of congestive heart failure                                                                                                                                                                                                                                                                                                                                                  |
| Hypertension by Dec 14, 2020                                             | HYP <sup>6</sup><br>CHC          | Inclusion in the database or where ICD10 code (I10-I13, I15) present in a CHC record before index the individual has a history of hypertension                                                                                                                                                                                                                                                                                                                                                                          |
| Dementia by Dec 14, 2020                                                 | DEMENTIA <sup>7</sup><br>CHC     | Inclusion in the database or where ICD10 code (F00-F03, G30) present in a CHC record before index the individual has a history of dementia                                                                                                                                                                                                                                                                                                                                                                              |

| <b>Variable</b>                                                                                                                                        | <b>Data Source</b>                                           | <b>Definition Description</b>                                                                                                                                                                                                                                                                                                                                                                                                                                                                                                                                                                                                                                                                                                                          |
|--------------------------------------------------------------------------------------------------------------------------------------------------------|--------------------------------------------------------------|--------------------------------------------------------------------------------------------------------------------------------------------------------------------------------------------------------------------------------------------------------------------------------------------------------------------------------------------------------------------------------------------------------------------------------------------------------------------------------------------------------------------------------------------------------------------------------------------------------------------------------------------------------------------------------------------------------------------------------------------------------|
| <b>Evidence of autoimmune disease between Dec 14, 2019 and Dec 14, 2020</b>                                                                            | ORAD <sup>8</sup><br>OCCC <sup>9</sup><br>DAD<br>OHIP<br>CHC | A composite variable indicating any of the following autoimmune conditions:<br><ol style="list-style-type: none"> <li>1) Rheumatoid Arthritis: Inclusion in the Ontario Rheumatoid Arthritis (ORAD) database or where ICD10 code (M05-M06) present in a CHC record before index</li> <li>2) Crohn's/Colitis: Presence in the Ontario Crohn's and Colitis cohort (OCCC) database or where ICD10 code (K50-K51) present in a CHC record before index</li> <li>3) Psoriasis: Evidence of psoriasis (ICD-10 code L40, M070, M071, M072, M073, M090 or at least 3 billings with diagnostic code 696 or 721) or multiple sclerosis (ICD-10 code G35 or at least 3 billings with diagnostic code 340) within a year in any of the listed databases</li> </ol> |
| <b>Evidence of being immunocompromised between Dec 14, 2019 and Dec 14, 2020 (or before Dec 14, 2020, in the case of presence in the HIV database)</b> | HIV <sup>10</sup><br>DAD<br>OHIP<br>NACRS<br>CHC             | A composite variable that indicates any of the following immunocompromised states:<br><ol style="list-style-type: none"> <li>1) HIV: presence in the ICES derived dataset HIV or where ICD10 code (B20-B24) present in a CHC record before index</li> <li>2) Cancer treatment (ICD-10 code Z510, Z511, Z512) within the past year</li> <li>3) Evidence of sickle-cell disease (ICD-10 code D570, D571, D572 or D578) in the past year</li> <li>4) Evidence of allogenic bone marrow transplant (CCI code 1WY19, 1LZ19HHU7, 1LZ19HHU8 or OHIP feecode Z246) in the past year</li> <li>5) Evidence of other immunocompromised conditions (ICD-10 code D80, D81, D82, D83, D84, D89 or billing with diagnostic code 279) in the past year</li> </ol>      |
| <b>Number of comorbidities</b>                                                                                                                         | N/A                                                          | Aggregate variable summarizing the number of comorbidities of the patient, categorized into zero (reference category), one, or two or more comorbidities.                                                                                                                                                                                                                                                                                                                                                                                                                                                                                                                                                                                              |
| <b>SARS-CoV-2 test between March 1, 2020 and Sept 30, 2021</b>                                                                                         | OLIS                                                         | Number of unique non-cancelled or rejected COVID-19 tests recorded in OLIS since March 2020. Also reported as Tested (yes vs no).                                                                                                                                                                                                                                                                                                                                                                                                                                                                                                                                                                                                                      |
| <b>COVID Infection or hospitalization from March 1, 2020 to Sept 30, 2021</b>                                                                          | OLIS<br>DAD                                                  | A composite variable indicating that the individual either tested positive for COVID-19 in OLIS (result = "P") and/or was hospitalized with an ICD-10 code indicating COVID-19 positive status (ICD-10 code U071).                                                                                                                                                                                                                                                                                                                                                                                                                                                                                                                                     |
| This variable only includes infections that received a positive test.                                                                                  |                                                              |                                                                                                                                                                                                                                                                                                                                                                                                                                                                                                                                                                                                                                                                                                                                                        |

| Variable                                                                                                                                                                                                                                                                                                                    | Data Source                          | Definition Description                                                                                                                                                                                                                                                                                                                                                                                                                                                                                                                                                                                                                                                                                             |
|-----------------------------------------------------------------------------------------------------------------------------------------------------------------------------------------------------------------------------------------------------------------------------------------------------------------------------|--------------------------------------|--------------------------------------------------------------------------------------------------------------------------------------------------------------------------------------------------------------------------------------------------------------------------------------------------------------------------------------------------------------------------------------------------------------------------------------------------------------------------------------------------------------------------------------------------------------------------------------------------------------------------------------------------------------------------------------------------------------------|
| <b>Receipt of an influenza vaccine in the 2019-20 or 2020-21 seasons</b>                                                                                                                                                                                                                                                    | ODB<br>OHIP<br>CHC                   | Any billing in ODB (DIN: 02015986, 02223929, 02269562, 02346850, 02362384, 02365936, 02420643, 02420686, 02420783, 02426544, 02428881, 02432730, 09857501) OR any evidence in OHIP (feecode: G590, G591, G592, Q130, Q590, Q690, Q691) OR evidence in CHC (presence in Immunization file with category="Influenza").<br><br>This variable does not include immunizations by public health units, in workplaces or through school clinics.                                                                                                                                                                                                                                                                          |
| <ul style="list-style-type: none"> <li><b>Outpatient visits with a general practitioner or CHC from Dec 14, 2018 to Dec 14, 2020 (historical use of health services)</b></li> <li><b>Outpatient visits with a general practitioner or CHC from Dec 14, 2020 to Sept 30, 2021 (recent use of health services)</b></li> </ul> | OHIP<br>CHC                          | Evidence of care in CHC or OHIP by a general practitioner (OHIP spec="00"). Excludes laboratory-only visits (visit only includes L0-L99 or G0-G99 feecodes) <sup>13</sup> .<br><br>Most frequent cause of visits include care for addictions and substance use, mental health or mental illness, and various acute and chronic conditions managed on an outpatient basis.                                                                                                                                                                                                                                                                                                                                          |
| <b>Mental health care encounter from Dec 14, 2019 to Dec 14, 2020</b>                                                                                                                                                                                                                                                       | DAD<br>NACRS<br>OMHRS<br>OHIP<br>CHC | 1 hospitalization OR 2 physician/CHC claims within 1 year or less of any of the following eligible codes:<br>ICD-10: F06, F07, F08, F09, F1, F2, F30, F31, F32, F33, F34, F38, F39, F4, F50, F51, F52, F531, F538, F539, F54, F59, F6, F7, F8, F90, F91, F92, F930, F931, F932, F933, F934, F938, F939, F94, F95, F98, F99, or X6, X7, X80, X81, X82, X83, X84, Y1, Y28 if dx10code1 not in F codes above<br>DSM-V: 290, 291, 292, 29381, 29382, 295, 296, 297, 298, 300, 303, 304, 305, 311, 312.51, 29383, 29384, 30113, 30921, 31323, 6254<br>OHIP dx: 291, 292, 295, 296, 297, 298, 299, 300, 301, 302, 303, 304, 306, 307, 309, 311, 313, 314, 315<br>OHIP fee code: A680, C680, K680, K682, K683, K684, Q021 |
| <b>Psychosis related mental health care from Dec 14, 2019 to Dec 14, 2020</b>                                                                                                                                                                                                                                               | DAD<br>NACRS<br>OMHRS<br>OHIP<br>CHC | 1 hospitalization, ED visit or physician/CHC claim within 1 year of the index date with any of the following eligible codes:<br>ICD-10: F060, F061, F062, F20, F22, F23, F24, F25, F28, F29, F531<br>DSM-V: 29381, 29382, 295, 297, 298<br>OHIP dx: 295, 297, 298<br>OHIP fee code: Q021                                                                                                                                                                                                                                                                                                                                                                                                                           |

| <b>Variable</b>                                                                    | <b>Data Source</b>                   | <b>Definition Description</b>                                                                                                                                                                                                                                                                                                                                                                                                                                       |
|------------------------------------------------------------------------------------|--------------------------------------|---------------------------------------------------------------------------------------------------------------------------------------------------------------------------------------------------------------------------------------------------------------------------------------------------------------------------------------------------------------------------------------------------------------------------------------------------------------------|
| <b>Mood disorders related mental health care from Dec 14, 2019 to Dec 14, 2020</b> | DAD<br>NACRS<br>OMHRS<br>OHIP<br>CHC | 1 hospitalization, ED visit or physician/CHC claim within 1 year of the index date with any of the following eligible codes:<br>ICD-10: F063, F064, F30, F31, F32, F33, F34, F38, F39, F40, F41, F530, F930, F931, F932, F94<br>DSM-V: 296, 300, 301, 3002, 3004, 6254, 29383, 29384, 30113, 30921, 31323<br>OHIP dx: 296, 300, 311                                                                                                                                 |
| <b>Substance use related mental health care from Dec 14, 2019 to Dec 14, 2020</b>  | DAD<br>NACRS<br>OMHRS<br>OHIP<br>CHC | 1 hospitalization, ED visit or physician/CHC claim within 1 year of the index date with any of the following eligible codes:<br>ICD-10: F1, F55<br>DSM-V: 291, 292, 303, 304, 305, 31251<br>OHIP dx: 291, 292, 303, 304<br>OHIP fee code: A680, C680, K680, K682, K683, K684                                                                                                                                                                                        |
| <b>Other mental health related care from Dec 14, 2019 to Dec 14, 2020</b>          | DAD<br>NACRS<br>OMHRS<br>OHIP<br>CHC | 1 hospitalization, ED visit or physician/CHC claim within 1 year of the index date with any of the following eligible codes:<br>ICD-10: F065, F066, F067, F068, F069, F07, F08, F09, F21, F42, F43, F44, F45, F48, F49, F50, F51, F52, F538, F539, F54, F59, F6, F7, F8, F90, F91, F92, F933, F934, F938, F939, F95, F98, F99 or X6, X7, X80, X81, X82, X83, X84, Y1, Y28 if dx10code1 not in F codes above<br>OHIP dx: 299, 301, 302, 306, 307, 309, 313, 314, 315 |
| <b>Vaccine product during observation period (Dec 14, 2020 to Sept 30, 2021)</b>   | COVAXON                              | Type of vaccine received:<br>a) Pfizer,<br>b) Moderna,<br>c) AstraZeneca/COVISHIELD<br>d) Janssen                                                                                                                                                                                                                                                                                                                                                                   |

| Variable                                                                                               | Data Source                  | Definition Description                                                                                                                                                                                                                                                                                                                                                                                                                                                                                                                                                                                                                                                                                                                                                                                                                                                                                                                                                                                                                                                                 |
|--------------------------------------------------------------------------------------------------------|------------------------------|----------------------------------------------------------------------------------------------------------------------------------------------------------------------------------------------------------------------------------------------------------------------------------------------------------------------------------------------------------------------------------------------------------------------------------------------------------------------------------------------------------------------------------------------------------------------------------------------------------------------------------------------------------------------------------------------------------------------------------------------------------------------------------------------------------------------------------------------------------------------------------------------------------------------------------------------------------------------------------------------------------------------------------------------------------------------------------------|
| <b>Status for which vaccine was received during observation period (Dec 14, 2020 to Sept 30, 2021)</b> | COVAXON<br>PHO <sup>14</sup> | <p>Priority status rationale for receipt of vaccine (recorded at first dose only):</p> <ul style="list-style-type: none"> <li>a) Age-based eligibility</li> <li>b) Congregate setting (includes "Congregate setting (not LTCH/RH) staff/resident", "LTCH resident", "RH resident")</li> <li>c) Priority populations (includes "High-risk condition adults and caregivers", "Adult recipients of chronic home care" and "Other priority population")</li> <li>d) Health-care Essential Workers (includes "HCW" "LTCH HCW" "RH HCW" "LTCH/RH employee/essential caregiver")</li> <li>e) Other Essential Workers (includes "Essential worker who cannot work from home" "Education and childcare worker" "Agricultural/farm/food manufacturing worker")</li> <li>f) Other (includes "Not reported" "Youth 12+" "Community at greater risk" – which is a geographic criterion for areas with high COVID-19 risk)</li> </ul> <p>This variable only records status at the time of the first dose. Individuals may be eligible through more than one status at the timing of vaccination.</p> |
| <b>Vaccine administration location during observation period (Dec 14, 2020 to Sept 30, 2021)</b>       | COVAXON                      | <p>Where the vaccine was administered:</p> <ul style="list-style-type: none"> <li>a) Congregate living/care</li> <li>b) Hospital</li> <li>c) Other</li> <li>d) PHU delivered clinic</li> <li>e) Pharmacy</li> <li>f) Physician's office</li> </ul>                                                                                                                                                                                                                                                                                                                                                                                                                                                                                                                                                                                                                                                                                                                                                                                                                                     |

## Appendix 6: COVID-19 vaccine coverage overall and in predefined subgroups as of Sept 30, 2021

|                                                                                       | Total population |         |      | One dose only |           |      | Two doses   |            |      | One or more doses |  |         | p-value* |
|---------------------------------------------------------------------------------------|------------------|---------|------|---------------|-----------|------|-------------|------------|------|-------------------|--|---------|----------|
|                                                                                       | N                | N       | %    | 95 CI%        | N         | %    | 95 CI%      | N          | %    | 95 CI%            |  |         |          |
| <b>Ontario population (aged ≥ 18)<sup>14</sup></b>                                    | 12,083,325       | 613,833 | 5.1  |               | 9,855,160 | 81.6 |             | 10,468,993 | 86.6 |                   |  |         |          |
| <b>IRHH overall (aged ≥ 18)</b>                                                       | 23,247           | 3,189   | 13.7 | 13.3 - 14.2   | 11,082    | 47.7 | 47.0 - 48.3 | 14,271     | 61.4 | 60.8 - 62.0       |  | <0.0001 |          |
| <b>Age groups (years)</b>                                                             |                  |         |      |               |           |      |             |            |      |                   |  |         |          |
| 18 to 29 years old                                                                    | 4,435            | 724     | 16.3 | 15.3 - 17.4   | 1,667     | 37.6 | 36.2 - 39.0 | 2,391      | 53.9 | 52.4 - 55.4       |  |         |          |
| 30 to 39 years old                                                                    | 7,086            | 1,173   | 16.6 | 15.7 - 17.4   | 2,578     | 36.4 | 35.3 - 37.5 | 3,751      | 52.9 | 51.8 - 54.1       |  |         |          |
| 40 to 49 years old                                                                    | 3,919            | 525     | 13.4 | 12.4 - 14.5   | 1,842     | 47.0 | 45.4 - 48.6 | 2,367      | 60.4 | 58.9 - 61.9       |  |         |          |
| 50 to 59 years old                                                                    | 3,642            | 445     | 12.2 | 11.2 - 13.3   | 2,025     | 55.6 | 54.0 - 57.2 | 2,470      | 67.8 | 66.3 - 69.3       |  |         |          |
| 60+ years old                                                                         | 4,165            | 322     | 7.7  | 7.0 - 8.6     | 2,970     | 71.3 | 69.9 - 72.7 | 3,292      | 79.0 | 77.8 - 80.3       |  |         |          |
| <b>Method of identification of individuals with a recent history of homelessness</b>  |                  |         |      |               |           |      |             |            |      |                   |  | <0.0001 |          |
| Hospital-based encounter only                                                         | 16,377           | 2,407   | 14.7 | 14.2 - 15.3   | 6,970     | 42.6 | 41.8 - 43.3 | 9,377      | 57.3 | 56.5 - 58.0       |  |         |          |
| Outpatient CHC visit                                                                  | 6,870            | 782     | 11.4 | 10.7 - 12.2   | 4,112     | 59.9 | 58.7 - 61.0 | 4,894      | 71.2 | 70.2 - 72.3       |  |         |          |
| <b>≥1 visits to an emergency department (Dec 14, 2020 to Sept 30, 2021)</b>           |                  |         |      |               |           |      |             |            |      |                   |  | <0.0001 |          |
| Yes                                                                                   | 15,327           | 2,369   | 15.5 | 14.9 - 16.0   | 6,899     | 45.0 | 44.2 - 45.8 | 9,268      | 60.5 | 59.7 - 61.2       |  |         |          |
| No                                                                                    | 7,920            | 820     | 10.4 | 9.7 - 11.0    | 4,183     | 52.8 | 51.7 - 53.9 | 5,003      | 63.2 | 62.1 - 64.2       |  |         |          |
| <b>≥1 outpatient visits to a general practitioner (Dec 14, 2020 to Sept 30, 2021)</b> |                  |         |      |               |           |      |             |            |      |                   |  | <0.0001 |          |
| No                                                                                    | 3,468            | 467     | 13.5 | 12.4 - 14.6   | 1,124     | 32.4 | 30.9 - 34.0 | 1,591      | 45.9 | 44.2 - 47.5       |  |         |          |
| Yes                                                                                   | 19,489           | 2,722   | 14.0 | 13.5 - 14.5   | 9,958     | 51.1 | 50.4 - 51.8 | 12,680     | 65.1 | 64.4 - 65.7       |  |         |          |
| <b>Receipt of an Influenza vaccine in the 2019-20 or 2020-21 seasons</b>              |                  |         |      |               |           |      |             |            |      |                   |  | <0.0001 |          |
| No                                                                                    | 20,957           | 2,997   | 14.3 | 13.8 - 14.8   | 9,259     | 44.2 | 44.8 - 46.1 | 12,256     | 58.5 | 57.8 - 59.2       |  |         |          |
| Yes                                                                                   | 2,290            | 192     | 8.4  | 7.3 - 9.6     | 1,823     | 79.6 | 77.9 - 81.2 | 2,015      | 88.0 | 86.6 - 89.3       |  |         |          |
| <b>Number of chronic health conditions</b>                                            |                  |         |      |               |           |      |             |            |      |                   |  | <0.0001 |          |
| 0                                                                                     | 12,023           | 1,825   | 15.2 | 14.6 - 15.8   | 4,737     | 39.4 | 38.5 - 40.3 | 6,562      | 54.6 | 53.7 - 55.5       |  |         |          |
| 1                                                                                     | 6,412            | 881     | 13.7 | 12.9 - 14.6   | 3,129     | 48.8 | 47.6 - 50.0 | 4,010      | 62.5 | 61.4 - 63.7       |  |         |          |
| 2+                                                                                    | 4,812            | 483     | 10.0 | 9.2 - 10.9    | 3,216     | 66.8 | 65.5 - 68.2 | 3,699      | 76.9 | 75.7 - 78.0       |  |         |          |



|                                                                           |        |       |      |             |       |      |             |       |      |             |         |
|---------------------------------------------------------------------------|--------|-------|------|-------------|-------|------|-------------|-------|------|-------------|---------|
| <b>Level of urbanicity</b>                                                |        |       |      |             |       |      |             |       |      |             | <0.0001 |
| Rural regions<br>(population <10 000)                                     | 1,503  | 214   | 14.2 | 12.6 - 16.1 | 695   | 46.2 | 43.7 - 48.8 | 909   | 60.5 | 58.0 - 62.9 |         |
| Small to medium<br>metropolitan region<br>(population 10 000-<br>500 000) | 9,034  | 1,386 | 15.3 | 14.6 - 16.1 | 3,833 | 42.4 | 41.4 - 43.5 | 5,219 | 57.8 | 56.8 - 58.8 |         |
| Large metropolitan<br>region (population<br>>500 000)                     | 12,123 | 1,497 | 12.3 | 11.8 - 13.0 | 6,319 | 52.1 | 51.2 - 53.0 | 7,816 | 64.5 | 63.6 - 65.3 |         |
| Unknown/missing                                                           | 587    | 92    | 15.7 | 13.0 - 18.8 | 235   | 40.0 | 36.2 - 44.1 | 327   | 55.7 | 51.7 - 59.7 |         |
| <b>Mental health-care encounter in the previous year</b>                  |        |       |      |             |       |      |             |       |      |             | <0.0001 |
| Yes                                                                       | 15,448 | 2,264 | 14.7 | 14.1 - 15.2 | 7,440 | 48.2 | 47.4 - 49.0 | 9,704 | 62.8 | 62.1 - 63.6 |         |
| No                                                                        | 7,799  | 925   | 11.9 | 11.2 - 12.6 | 3,642 | 46.7 | 45.6 - 47.8 | 4,567 | 58.6 | 57.5 - 59.7 |         |

\*within group p-values for coverage of 1+ doses ( $X^2$  test)

## Appendix 7: Characteristics of participants by maximum number of doses received as of Sept 30, 2021

|                                                                                                                      | Zero doses<br>(n=8,976) | One dose only<br>(n=3,189) | Two doses<br>(n=11,082) | p-value |
|----------------------------------------------------------------------------------------------------------------------|-------------------------|----------------------------|-------------------------|---------|
| <b>Demographics</b>                                                                                                  |                         |                            |                         |         |
| Age mean (SD)                                                                                                        | 39.35 (13.46)           | 39.50 (13.53)              | 47.37 (16.76)           | <.0001  |
| Age groups, N (%)                                                                                                    |                         |                            |                         |         |
| 18 to 29 years                                                                                                       | 2,044 (22.77%)          | 724 (22.70%)               | 1,667 (15.04%)          | <.0001  |
| 30 to 39 years                                                                                                       | 3,335 (37.15%)          | 1,173 (36.78%)             | 2,578 (23.26%)          |         |
| 40 to 49 years                                                                                                       | 1,552 (17.29%)          | 525 (16.46%)               | 1,842 (16.62%)          |         |
| 50 to 59 years                                                                                                       | 1,172 (13.06%)          | 445 (13.95%)               | 2,025 (18.27%)          |         |
| 60+ years                                                                                                            | 873 (9.73%)             | 322 (10.10%)               | 2,970 (26.80%)          |         |
| Female, N (%)                                                                                                        | 3,048 (33.96%)          | 1,102 (34.56%)             | 4,345 (39.21%)          | <.0001  |
| Level of urbanicity, N (%)                                                                                           |                         |                            |                         |         |
| Large metropolitan region<br>(> 500 000 population)                                                                  | 4,307 (47.98%)          | 1,497 (46.94%)             | 6,319 (57.02%)          | <.0001  |
| Small to medium metropolitan region<br>(10 000-500 000 population)                                                   | 3,815 (42.50%)          | 1,386 (43.46%)             | 3,833 (34.59%)          |         |
| Rural regions (<10 000 population)                                                                                   | 594 (6.62%)             | 214 (6.71%)                | 695 (6.27%)             |         |
| Unknown/missing                                                                                                      | 260 (2.90%)             | 92 (2.88%)                 | 235 (2.12%)             |         |
| Evidence of homelessness between<br>June 14, 2018 and June 14, 2020, N (%)                                           | 4,140 (46.12%)          | 1,520 (47.66%)             | 4,894 (44.16%)          | 0.0005  |
| Identified as IRHH via a CHC encounter                                                                               | 1,976 (22.01%)          | 782 (24.52%)               | 4,112 (37.11%)          | <.0001  |
| <b>Health status, N (%)</b>                                                                                          |                         |                            |                         |         |
| Chronic health conditions                                                                                            |                         |                            |                         |         |
| Asthma                                                                                                               | 1,425 (15.88%)          | 549 (17.22%)               | 1,830 (16.51%)          | 0.1796  |
| Chronic obstructive pulmonary disease                                                                                | 852 (9.49%)             | 376 (11.79%)               | 2,087 (18.83%)          | <.0001  |
| Congestive heart failure                                                                                             | 169 (1.88%)             | 63 (1.98%)                 | 543 (4.90%)             | <.0001  |
| Hypertension                                                                                                         | 1,088 (12.12%)          | 437 (13.70%)               | 3,148 (28.41%)          | <.0001  |
| Diabetes                                                                                                             | 849 (9.46%)             | 339 (10.63%)               | 2,387 (21.54%)          | <.0001  |
| Dementia                                                                                                             | 95 (1.06%)              | 49 (1.54%)                 | 483 (4.36%)             | <.0001  |
| Autoimmune diseases (multiple sclerosis, psoriasis,<br>rheumatoid arthritis, Crohn's disease, or ulcerative colitis) | 253 (2.82%)             | 108 (3.39%)                | 666 (6.01%)             | <.0001  |
| Immunocompromised state (cancer, sickle cell, HIV, other)                                                            | 392 (4.37%)             | 171 (5.36%)                | 593 (5.35%)             | 0.0034  |

|                                                                                                               |                   |                   |                   |        |
|---------------------------------------------------------------------------------------------------------------|-------------------|-------------------|-------------------|--------|
| Number of chronic conditions <sup>1</sup>                                                                     |                   |                   |                   |        |
| 0                                                                                                             | 5,461 (60.84%)    | 1,825 (57.23%)    | 4,737 (42.74%)    | <.0001 |
| 1                                                                                                             | 2,402 (26.76%)    | 881 (27.63%)      | 3,129 (28.23%)    |        |
| 2+                                                                                                            | 1,113 (12.40%)    | 483 (15.15%)      | 3,216 (29.02%)    |        |
| <b>Historical use of health services</b>                                                                      |                   |                   |                   |        |
| Visits to an ED (2-year lookback), mean (SD)                                                                  | 6.99 (14.13)      | 8.34 (17.05)      | 7.23 (16.66)      | 0.0002 |
| Outpatient visits to a general practitioner <sup>2</sup><br>(2-year lookback), median (IQR)                   | 3.00 (1.00-10.00) | 6.00 (2.00-16.00) | 7.00 (3.00-16.00) | <.0001 |
| Receipt of an Influenza vaccine in 2019-20 or 2020-21<br>seasons, N (%)                                       | 275 (3.06%)       | 192 (6.02%)       | 1,823 (16.45%)    | <.0001 |
| Mental healthcare encounter<br>(1 year lookback), N (%)                                                       | 5,744 (63.99%)    | 2,264 (70.99%)    | 7,440 (67.14%)    | <.0001 |
| Specific mental health conditions                                                                             |                   |                   |                   |        |
| Psychotic disorder                                                                                            | 997 (11.11%)      | 405 (12.70%)      | 1,415 (12.77%)    | 0.0009 |
| Mood disorder                                                                                                 | 2,628 (29.28%)    | 1,111 (34.84%)    | 4,279 (38.61%)    | <.0001 |
| Substance use related disorder                                                                                | 3,889 (43.33%)    | 1,614 (50.61%)    | 4,183 (37.75%)    | <.0001 |
| Other mental health related care                                                                              | 1,626 (18.11%)    | 656 (20.57%)      | 2,812 (25.37%)    | <.0001 |
| <b>Recent use of health services</b>                                                                          |                   |                   |                   |        |
| ≥ 1 SARS-CoV-2 test (Mar 1, 2020<br>to Sept 30, 2021), N (%)                                                  | 6,311 (70.31%)    | 2,577 (80.81%)    | 8,760 (79.05%)    | <.0001 |
| Infection or hospitalization for COVID-19<br>(Mar 1, 2020 to Sept 30, 2021), N (%)                            | 715 (7.97%)       | 337 (10.57%)      | 1,015 (9.16%)     | <.0001 |
| Outpatient visits to a general practitioner <sup>2</sup> , any (Dec 14, 2020<br>to Sept 30, 2021), mean (IQR) | 2.00 (0.00-7.00)  | 4.00 (1.00-10.00) | 5.00 (1.00-11.00) | <.0001 |
| ≥1 in-person outpatient visits to a general practitioner (Dec<br>14, 2020 to Sept 30, 2021), N (%)            | 6,311 (70.31%)    | 2,567 (80.50%)    | 9,348 (84.35%)    | <.0001 |
| Visits to an emergency department (Dec 14, 2020 to Sept 30,<br>2021), mean (SD)                               | 1.00 (0.00-3.00)  | 2.00 (0.00-4.00)  | 1.00 (0.00-3.00)  | <.0001 |
| ≥1 visit to an emergency department (Dec 14, 2020 to Sept<br>30, 2021), N (%)                                 | 6,059 (67.50%)    | 2,369 (74.29%)    | 6,899 (62.25%)    | <.0001 |

**Month dose received, N (%)**

|                          |  |              |                |    |
|--------------------------|--|--------------|----------------|----|
| January or February 2021 |  | 22 (0.69%)   | 149 (1.34%)    | NA |
| March 2021               |  | 258 (8.09%)  | 214 (1.93%)    |    |
| April 2021               |  | 398 (12.48%) | 290 (2.62%)    |    |
| May 2021                 |  | 323 (10.13%) | 461 (4.16%)    |    |
| June 2021                |  | 388 (12.17%) | 3,492 (31.51%) |    |
| July 2021                |  | 473 (14.83%) | 3,783 (34.14%) |    |
| August 2021              |  | 466 (14.61%) | 1,575 (14.21%) |    |
| September 2021           |  | 861 (27.00%) | 1,118 (10.09%) |    |

<sup>1</sup>Sum of the specific chronic health conditions

<sup>2</sup>General practitioner visits include outpatient visits to a physician with the OHIP designation of "FAMILY PRACTICE AND GENERAL PRACTICE" or any visit to a Community Health Centre.

SD = standard deviation, ED = emergency department, NA = not applicable; test not performed

## References

1. Schull MJ, Azimaee M, Marra M, Cartagena RG, Vermeulen MJ, Ho M, & Guttman A. ICES: data, discovery, better health. *International Journal of Population Data Science*. 2019, 4(2).
2. Gershon AS, Wang C, Guan J, Vasilevska-Ristovska J, Cicutto L, To T. Identifying individuals with physician diagnosed COPD in health administrative databases. *COPD*. 2009; 6(5):388-394.
3. Gershon AS, Wang C, Guan J, Vasilevska-Ristovska J, Cicutto L, To T. Identifying patients with physician-diagnosed asthma in health administrative databases. *Can Respir J*. 2009; 16:183-8.
4. Hux JE, Ivis F, Flintoft V, Bica A. Diabetes in Ontario: determination of prevalence and incidence using a validated administrative data algorithm. *Diabetes Care*. 2002; 25(3):512-516.
5. Schultz SE, Rothwell DM, Chen Z, Tu K. Identifying cases of congestive heart failure from administrative data: a validation study using primary care patient records. *Chronic Dis Inj Can*. 2013; 33(3):160-166.
6. Tu K, Lipscombe LL, Chen ZL, for the CHEP Outcomes Research Taskforce. Prevalence and incidence of hypertension from 1995 to 2005: a population-based study. *CMAJ*. 2008; 178(11):1429-35
7. Jaakkimainen RL, Bronskill SE, Tierney M, Hermann N, Green D, Young J et al. Identification of physician-diagnosed Alzheimer's disease and related dementias in population-based administrative data: a validation study using family physicians' electronic medical records. *J of Alzheimer's Disease*. 2016; 54:337-349
8. Benchimol EI, Guttman A, Mack DR, Nguyen GC, Marshall JK, Gregor JC et al. Validation of international algorithms to identify adults with inflammatory bowel disease in health administrative data from Ontario, Canada. *J Clin Epidemiol*. 2014; 67(8):887-96
9. Widdifield J, Bombardier C, Bernatsky S, Paterson JM, Green D, Young J et al. An administrative data validation study of the accuracy of algorithms for identifying rheumatoid arthritis: the influence of the reference standard on algorithm performance. *BMC musculoskeletal disorders*. 2014; 23;15(1):216.
10. Gershon AS, Wang C, Antoniou T, Zagorski B, Loutfy MR, Strike C et al. Validation of Case-Finding Algorithms Derived from Administrative Data for Identifying Adults Living with Human Immunodeficiency Virus Infection. *Plos One*. 2011; 6(6):e21748.
11. Canadian Institute for Health Information. Data quality documentation: Discharge Abstract Database — current-year information 2018–2019 (2019). Canadian Institute for Health Information, Ottawa.
12. Booth R, Richard L, Forchuk C, Shariff SZ. Utility, Limitations and Opportunities for Using Linked Health Administrative Data to Study Homelessness in Ontario. *Healthcare Quarterly*. 2022, 24.2
13. MHASEF Research Team. The Mental Health of Children and Youth in Ontario: 2017 Scorecard [Technical Appendix]. Toronto, ON: Institute for Clinical Evaluative Sciences; 2017. 56p. Available from: <https://www.ices.on.ca/Publications/Atlases-and-Reports/2017/MHASEF>
14. Ontario Agency for Health Protection and Promotion. COVID-19 vaccine uptake in Ontario: December 14, 2020 to October 11, 2021 [Technical Notes]. Toronto, ON: Queen's Printer for Ontario; 2021.
